# Supplementary material for: The association of maternal smoking around birth with chronic respiratory diseases in adult offspring: A Mendelian randomization study
Source: PubMed Central journal article supplement (PMC11210268; doi:10.18332/tid/189394), 2024-06-27
Supplement: TID-22-120-s1.pdf [file TID-22-120-s1.pdf]

**Table 1 Individual SNP information incl**

| <b>exposure</b>              | <b>GWAS Catalog</b> | <b>outcome</b>                     | <b>GWAS ID</b>          | <b>SNP</b>  | <b>chromosomes</b> | <b>position</b> |
|------------------------------|---------------------|------------------------------------|-------------------------|-------------|--------------------|-----------------|
| maternal smoking around birt | GCST90041844        | Diseases of the respiratory system | finn-b-J10_RESPIRATORY  | rs1040151   | 10                 | 126062763       |
|                              |                     |                                    |                         | rs10789442  | 1                  | 44140075        |
|                              |                     |                                    |                         | rs113331826 | 11                 | 29861212        |
|                              |                     |                                    |                         | rs113927489 | 9                  | 136467207       |
|                              |                     |                                    |                         | rs13285789  | 9                  | 14483853        |
|                              |                     |                                    |                         | rs1569216   | 4                  | 172473450       |
|                              |                     |                                    |                         | rs34364357  | 3                  | 140346921       |
|                              |                     |                                    |                         | rs35194198  | 8                  | 144260893       |
|                              |                     |                                    |                         | rs35566160  | 2                  | 164928199       |
|                              |                     |                                    |                         | rs36022874  | 11                 | 113738340       |
|                              |                     |                                    |                         | rs36072649  | 4                  | 140939110       |
|                              |                     |                                    |                         | rs56322375  | 17                 | 32906373        |
|                              |                     |                                    |                         | rs62259107  | 3                  | 67124565        |
|                              |                     |                                    |                         | rs7002049   | 8                  | 93114414        |
|                              |                     |                                    |                         | rs792458    | 10                 | 22133793        |
| rs794375                     | 7                   | 75147801                           |                         |             |                    |                 |
| maternal smoking around birt | GCST90041844        | Respiratory insufficiency          | finn-b-RESPIRATORYINSUF | rs1040151   | 10                 | 126062763       |
|                              |                     |                                    |                         | rs10789442  | 1                  | 44140075        |
|                              |                     |                                    |                         | rs113331826 | 11                 | 29861212        |
|                              |                     |                                    |                         | rs113927489 | 9                  | 136467207       |
|                              |                     |                                    |                         | rs13285789  | 9                  | 14483853        |
|                              |                     |                                    |                         | rs1569216   | 4                  | 172473450       |
|                              |                     |                                    |                         | rs34364357  | 3                  | 140346921       |
|                              |                     |                                    |                         | rs35194198  | 8                  | 144260893       |
|                              |                     |                                    |                         | rs35566160  | 2                  | 164928199       |
|                              |                     |                                    |                         | rs36022874  | 11                 | 113738340       |
|                              |                     |                                    |                         | rs36072649  | 4                  | 140939110       |
|                              |                     |                                    |                         | rs56322375  | 17                 | 32906373        |
|                              |                     |                                    |                         | rs62259107  | 3                  | 67124565        |
|                              |                     |                                    |                         | rs6508145   | 18                 | 50115886        |

|                                           |                                      |                          |             |    |           |
|-------------------------------------------|--------------------------------------|--------------------------|-------------|----|-----------|
| maternal smoking around birt GCST90041844 | COPD-related respiratory insufficien | finn-b-COPD_INSUFFICIENC | rs7002049   | 8  | 93114414  |
|                                           |                                      |                          | rs792458    | 10 | 22133793  |
|                                           |                                      |                          | rs794375    | 7  | 75147801  |
|                                           |                                      |                          | rs1040151   | 10 | 126062763 |
|                                           |                                      |                          | rs10789442  | 1  | 44140075  |
|                                           |                                      |                          | rs113331826 | 11 | 29861212  |
|                                           |                                      |                          | rs113927489 | 9  | 136467207 |
|                                           |                                      |                          | rs13285789  | 9  | 14483853  |
|                                           |                                      |                          | rs1569216   | 4  | 172473450 |
|                                           |                                      |                          | rs34364357  | 3  | 140346921 |
|                                           |                                      |                          | rs35194198  | 8  | 144260893 |
|                                           |                                      |                          | rs35566160  | 2  | 164928199 |
|                                           |                                      |                          | rs36022874  | 11 | 113738340 |
|                                           |                                      |                          | rs36072649  | 4  | 140939110 |
|                                           |                                      |                          | rs56322375  | 17 | 32906373  |
|                                           |                                      |                          | rs576982    | 15 | 78870803  |
|                                           |                                      |                          | rs62259107  | 3  | 67124565  |
| rs6508145                                 | 18                                   | 50115886                 |             |    |           |
| rs7002049                                 | 8                                    | 93114414                 |             |    |           |
| rs792458                                  | 10                                   | 22133793                 |             |    |           |
| rs794375                                  | 7                                    | 75147801                 |             |    |           |
| maternal smoking around birt GCST90041844 | Emphysema                            | finn-b-J10_EMPHYSEMA     | rs1040151   | 10 | 126062763 |
|                                           |                                      |                          | rs10789442  | 1  | 44140075  |
|                                           |                                      |                          | rs113331826 | 11 | 29861212  |
|                                           |                                      |                          | rs113927489 | 9  | 136467207 |
|                                           |                                      |                          | rs13285789  | 9  | 14483853  |
|                                           |                                      |                          | rs1569216   | 4  | 172473450 |
|                                           |                                      |                          | rs34364357  | 3  | 140346921 |
|                                           |                                      |                          | rs35194198  | 8  | 144260893 |
|                                           |                                      |                          | rs35566160  | 2  | 164928199 |
|                                           |                                      |                          | rs36022874  | 11 | 113738340 |
| rs36072649                                | 4                                    | 140939110                |             |    |           |

|                                                                     |                      |             |    |           |
|---------------------------------------------------------------------|----------------------|-------------|----|-----------|
| maternal smoking around birt GCST90041844 COPD                      | finn-b-J10_COPD      | rs56322375  | 17 | 32906373  |
|                                                                     |                      | rs62259107  | 3  | 67124565  |
|                                                                     |                      | rs6508145   | 18 | 50115886  |
|                                                                     |                      | rs7002049   | 8  | 93114414  |
|                                                                     |                      | rs792458    | 10 | 22133793  |
|                                                                     |                      | rs794375    | 7  | 75147801  |
|                                                                     |                      | rs1040151   | 10 | 126062763 |
|                                                                     |                      | rs10789442  | 1  | 44140075  |
|                                                                     |                      | rs113331826 | 11 | 29861212  |
|                                                                     |                      | rs113927489 | 9  | 136467207 |
|                                                                     |                      | rs13285789  | 9  | 14483853  |
|                                                                     |                      | rs1569216   | 4  | 172473450 |
|                                                                     |                      | rs34364357  | 3  | 140346921 |
|                                                                     |                      | rs35194198  | 8  | 144260893 |
|                                                                     |                      | rs35566160  | 2  | 164928199 |
|                                                                     |                      | rs36022874  | 11 | 113738340 |
|                                                                     |                      | rs36072649  | 4  | 140939110 |
| rs56322375                                                          | 17                   | 32906373    |    |           |
| rs62259107                                                          | 3                    | 67124565    |    |           |
| rs6508145                                                           | 18                   | 50115886    |    |           |
| rs7002049                                                           | 8                    | 93114414    |    |           |
| rs792458                                                            | 10                   | 22133793    |    |           |
| rs794375                                                            | 7                    | 75147801    |    |           |
| maternal smoking around birt GCST90041844 COPD, hospital admissions | finn-b-COPD_HOSPITAL | rs1040151   | 10 | 126062763 |
|                                                                     |                      | rs10789442  | 1  | 44140075  |
|                                                                     |                      | rs113331826 | 11 | 29861212  |
|                                                                     |                      | rs113927489 | 9  | 136467207 |
|                                                                     |                      | rs13285789  | 9  | 14483853  |
|                                                                     |                      | rs1569216   | 4  | 172473450 |
|                                                                     |                      | rs34364357  | 3  | 140346921 |
|                                                                     |                      | rs35194198  | 8  | 144260893 |
|                                                                     |                      | rs35566160  | 2  | 164928199 |

|                                           |                  |                   |             |           |           |
|-------------------------------------------|------------------|-------------------|-------------|-----------|-----------|
|                                           |                  | rs36022874        | 11          | 113738340 |           |
|                                           |                  | rs36072649        | 4           | 140939110 |           |
|                                           |                  | rs56322375        | 17          | 32906373  |           |
|                                           |                  | rs62259107        | 3           | 67124565  |           |
|                                           |                  | rs6508145         | 18          | 50115886  |           |
|                                           |                  | rs7002049         | 8           | 93114414  |           |
|                                           |                  | rs792458          | 10          | 22133793  |           |
|                                           |                  | rs794375          | 7           | 75147801  |           |
| maternal smoking around birt GCST90041844 | Early onset COPD | finn-b-COPD_EARLY | rs1040151   | 10        | 126062763 |
|                                           |                  |                   | rs10789442  | 1         | 44140075  |
|                                           |                  |                   | rs111860035 | 3         | 5021325   |
|                                           |                  |                   | rs11210247  | 1         | 73900932  |
|                                           |                  |                   | rs113331826 | 11        | 29861212  |
|                                           |                  |                   | rs113927489 | 9         | 136467207 |
|                                           |                  |                   | rs114000606 | 1         | 11333812  |
|                                           |                  |                   | rs11653367  | 17        | 44191483  |
|                                           |                  |                   | rs13123903  | 4         | 35513601  |
|                                           |                  |                   | rs13285789  | 9         | 14483853  |
|                                           |                  |                   | rs13356444  | 5         | 30919960  |
|                                           |                  |                   | rs1371274   | 18        | 1837007   |
|                                           |                  |                   | rs138425427 | 16        | 30591862  |
|                                           |                  |                   | rs1438299   | 5         | 12925979  |
|                                           |                  |                   | rs1569216   | 4         | 172473450 |
|                                           |                  |                   | rs17133347  | 7         | 3472721   |
|                                           |                  |                   | rs1958671   | 14        | 57363484  |
|                                           |                  |                   | rs254945    | 16        | 8956703   |
|                                           |                  |                   | rs2624839   | 3         | 50202231  |
|                                           |                  |                   | rs2693286   | 2         | 199703219 |
|                                           |                  |                   | rs2710634   | 2         | 32808804  |
|                                           |                  |                   | rs322640    | 18        | 34592625  |
|                                           |                  |                   | rs34364357  | 3         | 140346921 |
|                                           |                  |                   | rs34832954  | 10        | 107364513 |

|                                                            |                   |           |           |           |
|------------------------------------------------------------|-------------------|-----------|-----------|-----------|
|                                                            | rs35194198        | 8         | 144260893 |           |
|                                                            | rs35566160        | 2         | 164928199 |           |
|                                                            | rs36022874        | 11        | 113738340 |           |
|                                                            | rs36072649        | 4         | 140939110 |           |
|                                                            | rs3796432         | 4         | 96030402  |           |
|                                                            | rs38849           | 7         | 116332539 |           |
|                                                            | rs4551449         | 9         | 22610366  |           |
|                                                            | rs4557199         | 3         | 77069266  |           |
|                                                            | rs4654327         | 1         | 29190138  |           |
|                                                            | rs4757365         | 11        | 15815555  |           |
|                                                            | rs4865667         | 5         | 50748173  |           |
|                                                            | rs517680          | 1         | 112356899 |           |
|                                                            | rs55741516        | 14        | 42697579  |           |
|                                                            | rs56322375        | 17        | 32906373  |           |
|                                                            | rs575030          | 11        | 121092398 |           |
|                                                            | rs5762858         | 22        | 29249002  |           |
|                                                            | rs6120777         | 20        | 33560172  |           |
|                                                            | rs62259107        | 3         | 67124565  |           |
|                                                            | rs6508145         | 18        | 50115886  |           |
|                                                            | rs6706169         | 2         | 166281132 |           |
|                                                            | rs676217          | 11        | 30195757  |           |
|                                                            | rs6985180         | 8         | 115759747 |           |
|                                                            | rs7002049         | 8         | 93114414  |           |
|                                                            | rs709400          | 14        | 104149475 |           |
|                                                            | rs73430670        | 11        | 27615630  |           |
|                                                            | rs7766061         | 6         | 131967033 |           |
|                                                            | rs7770593         | 6         | 24310319  |           |
|                                                            | rs78420531        | 17        | 43249246  |           |
|                                                            | rs792458          | 10        | 22133793  |           |
|                                                            | rs794375          | 7         | 75147801  |           |
|                                                            | rs9375772         | 6         | 131143651 |           |
| maternal smoking around birt GCST90041844 Later onset COPD | finn-b-COPD_LATER | rs1040151 | 10        | 126062763 |

|                              |              |                    |             |           |           |
|------------------------------|--------------|--------------------|-------------|-----------|-----------|
|                              |              | rs10789442         | 1           | 44140075  |           |
|                              |              | rs113331826        | 11          | 29861212  |           |
|                              |              | rs113927489        | 9           | 136467207 |           |
|                              |              | rs13285789         | 9           | 14483853  |           |
|                              |              | rs1569216          | 4           | 172473450 |           |
|                              |              | rs34364357         | 3           | 140346921 |           |
|                              |              | rs35194198         | 8           | 144260893 |           |
|                              |              | rs35566160         | 2           | 164928199 |           |
|                              |              | rs36022874         | 11          | 113738340 |           |
|                              |              | rs36072649         | 4           | 140939110 |           |
|                              |              | rs56322375         | 17          | 32906373  |           |
|                              |              | rs62259107         | 3           | 67124565  |           |
|                              |              | rs6508145          | 18          | 50115886  |           |
|                              |              | rs7002049          | 8           | 93114414  |           |
|                              |              | rs792458           | 10          | 22133793  |           |
|                              |              | rs794375           | 7           | 75147801  |           |
| maternal smoking around birt | GCST90041844 | Asthma             |             |           |           |
|                              |              | ebi-a-GCST90014325 | rs1040151   | 10        | 126062763 |
|                              |              |                    | rs10789442  | 1         | 44140075  |
|                              |              |                    | rs113331826 | 11        | 29861212  |
|                              |              |                    | rs113927489 | 9         | 136467207 |
|                              |              |                    | rs12920941  | 16        | 24830866  |
|                              |              |                    | rs13285789  | 9         | 14483853  |
|                              |              |                    | rs1569216   | 4         | 172473450 |
|                              |              |                    | rs34364357  | 3         | 140346921 |
|                              |              |                    | rs35194198  | 8         | 144260893 |
|                              |              |                    | rs35566160  | 2         | 164928199 |
|                              |              |                    | rs36022874  | 11        | 113738340 |
|                              |              |                    | rs36072649  | 4         | 140939110 |
|                              |              |                    | rs56322375  | 17        | 32906373  |
|                              |              |                    | rs62259107  | 3         | 67124565  |
|                              |              |                    | rs6508145   | 18        | 50115886  |
|                              |              |                    | rs7002049   | 8         | 93114414  |

|                                                                         |                    |             |    |           |
|-------------------------------------------------------------------------|--------------------|-------------|----|-----------|
| maternal smoking around birt GCST90041844 Idiopathic pulmonary fibrosis | ebi-a-GCST90018120 | rs792458    | 10 | 22133793  |
|                                                                         |                    | rs794375    | 7  | 75147801  |
|                                                                         |                    | rs1040151   | 10 | 126062763 |
|                                                                         |                    | rs10789442  | 1  | 44140075  |
|                                                                         |                    | rs113331826 | 11 | 29861212  |
|                                                                         |                    | rs113927489 | 9  | 136467207 |
|                                                                         |                    | rs12920941  | 16 | 24830866  |
|                                                                         |                    | rs13285789  | 9  | 14483853  |
|                                                                         |                    | rs1569216   | 4  | 172473450 |
|                                                                         |                    | rs34364357  | 3  | 140346921 |
|                                                                         |                    | rs35194198  | 8  | 144260893 |
|                                                                         |                    | rs35566160  | 2  | 164928199 |
|                                                                         |                    | rs36022874  | 11 | 113738340 |
|                                                                         |                    | rs36072649  | 4  | 140939110 |
|                                                                         |                    | rs56322375  | 17 | 32906373  |
|                                                                         |                    | rs62259107  | 3  | 67124565  |
|                                                                         |                    | rs6508145   | 18 | 50115886  |
| rs7002049                                                               | 8                  | 93114414    |    |           |
| rs792458                                                                | 10                 | 22133793    |    |           |
| rs794375                                                                | 7                  | 75147801    |    |           |
| maternal smoking around birt GCST90041844 Lung cancer                   | ieu-a-966          | rs111860035 | 3  | 5021325   |
|                                                                         |                    | rs113331826 | 11 | 29861212  |
|                                                                         |                    | rs113927489 | 9  | 136467207 |
|                                                                         |                    | rs13285789  | 9  | 14483853  |
|                                                                         |                    | rs13356444  | 5  | 30919960  |
|                                                                         |                    | rs1371274   | 18 | 1837007   |
|                                                                         |                    | rs138425427 | 16 | 30591862  |
|                                                                         |                    | rs1438299   | 5  | 12925979  |
|                                                                         |                    | rs1569216   | 4  | 172473450 |
|                                                                         |                    | rs17133347  | 7  | 3472721   |
|                                                                         |                    | rs1958671   | 14 | 57363484  |
| rs254945                                                                | 16                 | 8956703     |    |           |

|                              |              |                           |             |    |           |
|------------------------------|--------------|---------------------------|-------------|----|-----------|
|                              |              |                           | rs2693286   | 2  | 199703219 |
|                              |              |                           | rs322640    | 18 | 34592625  |
|                              |              |                           | rs34832954  | 10 | 107364513 |
|                              |              |                           | rs35194198  | 8  | 144260893 |
|                              |              |                           | rs35566160  | 2  | 164928199 |
|                              |              |                           | rs36022874  | 11 | 113738340 |
|                              |              |                           | rs3796432   | 4  | 96030402  |
|                              |              |                           | rs38849     | 7  | 116332539 |
|                              |              |                           | rs4551449   | 9  | 22610366  |
|                              |              |                           | rs4654327   | 1  | 29190138  |
|                              |              |                           | rs4757365   | 11 | 15815555  |
|                              |              |                           | rs4865667   | 5  | 50748173  |
|                              |              |                           | rs517680    | 1  | 112356899 |
|                              |              |                           | rs55741516  | 14 | 42697579  |
|                              |              |                           | rs56322375  | 17 | 32906373  |
|                              |              |                           | rs6508145   | 18 | 50115886  |
|                              |              |                           | rs6706169   | 2  | 166281132 |
|                              |              |                           | rs676217    | 11 | 30195757  |
|                              |              |                           | rs6985180   | 8  | 115759747 |
|                              |              |                           | rs7002049   | 8  | 93114414  |
|                              |              |                           | rs7766061   | 6  | 131967033 |
|                              |              |                           | rs78420531  | 17 | 43249246  |
|                              |              |                           | rs792458    | 10 | 22133793  |
|                              |              |                           | rs794375    | 7  | 75147801  |
|                              |              |                           | rs9375772   | 6  | 131143651 |
| maternal smoking around birt | GCST90041844 | Small cell lung carcinoma | rs1040151   | 10 | 126062763 |
|                              |              |                           | rs10789442  | 1  | 44140075  |
|                              |              |                           | rs11210247  | 1  | 73900932  |
|                              |              |                           | rs113331826 | 11 | 29861212  |
|                              |              |                           | rs12920941  | 16 | 24830866  |
|                              |              |                           | rs13356444  | 5  | 30919960  |
|                              |              |                           | rs1371274   | 18 | 1837007   |



maternal smoking around birt GCST90041844 Squamous cell lung cancer

ieu-a-989

|             |    |           |
|-------------|----|-----------|
| rs1438299   | 5  | 12925979  |
| rs1569216   | 4  | 172473450 |
| rs254945    | 16 | 8956703   |
| rs34364357  | 3  | 140346921 |
| rs34832954  | 10 | 107364513 |
| rs35194198  | 8  | 144260893 |
| rs36022874  | 11 | 113738340 |
| rs36072649  | 4  | 140939110 |
| rs3796432   | 4  | 96030402  |
| rs41860     | 7  | 69001742  |
| rs4551449   | 9  | 22610366  |
| rs4557199   | 3  | 77069266  |
| rs4654327   | 1  | 29190138  |
| rs4757365   | 11 | 15815555  |
| rs4865667   | 5  | 50748173  |
| rs517680    | 1  | 112356899 |
| rs56322375  | 17 | 32906373  |
| rs575030    | 11 | 121092398 |
| rs5762858   | 22 | 29249002  |
| rs6120777   | 20 | 33560172  |
| rs6508145   | 18 | 50115886  |
| rs676217    | 11 | 30195757  |
| rs7002049   | 8  | 93114414  |
| rs73430670  | 11 | 27615630  |
| rs7766061   | 6  | 131967033 |
| rs7770593   | 6  | 24310319  |
| rs78420531  | 17 | 43249246  |
| rs794375    | 7  | 75147801  |
| rs9375772   | 6  | 131143651 |
| rs1040151   | 10 | 126062763 |
| rs111860035 | 3  | 5021325   |
| rs11210247  | 1  | 73900932  |

|             |    |           |
|-------------|----|-----------|
| rs113331826 | 11 | 29861212  |
| rs12920941  | 16 | 24830866  |
| rs13285789  | 9  | 14483853  |
| rs13356444  | 5  | 30919960  |
| rs1371274   | 18 | 1837007   |
| rs138425427 | 16 | 30591862  |
| rs1438299   | 5  | 12925979  |
| rs1569216   | 4  | 172473450 |
| rs1958671   | 14 | 57363484  |
| rs254945    | 16 | 8956703   |
| rs2693286   | 2  | 199703219 |
| rs2710634   | 2  | 32808804  |
| rs322640    | 18 | 34592625  |
| rs34364357  | 3  | 140346921 |
| rs34832954  | 10 | 107364513 |
| rs35194198  | 8  | 144260893 |
| rs36022874  | 11 | 113738340 |
| rs36072649  | 4  | 140939110 |
| rs3796432   | 4  | 96030402  |
| rs41860     | 7  | 69001742  |
| rs4551449   | 9  | 22610366  |
| rs4654327   | 1  | 29190138  |
| rs4757365   | 11 | 15815555  |
| rs4865667   | 5  | 50748173  |
| rs517680    | 1  | 112356899 |
| rs55741516  | 14 | 42697579  |
| rs56322375  | 17 | 32906373  |
| rs575030    | 11 | 121092398 |
| rs6120777   | 20 | 33560172  |
| rs62259107  | 3  | 67124565  |
| rs6508145   | 18 | 50115886  |
| rs6706169   | 2  | 166281132 |

|            |    |           |
|------------|----|-----------|
| rs676217   | 11 | 30195757  |
| rs6985180  | 8  | 115759747 |
| rs7002049  | 8  | 93114414  |
| rs73430670 | 11 | 27615630  |
| rs7766061  | 6  | 131967033 |
| rs78420531 | 17 | 43249246  |
| rs794375   | 7  | 75147801  |
| rs9375772  | 6  | 131143651 |

---

cluded in Mendelian randomization analysis

| effect_allele.exposure | other_allele.exposure | effect_allele.outcome | other_allele.outcom | beta.exposure | beta.outcome | eaf.exposure |
|------------------------|-----------------------|-----------------------|---------------------|---------------|--------------|--------------|
| G                      | A                     | G                     | A                   | 0,0360543     | -0,0042      | 0,186186     |
| C                      | A                     | C                     | A                   | -0,036768     | 0,0063       | 0,333704     |
| C                      | T                     | C                     | T                   | -0,0844322    | -0,008       | 0,0242447    |
| G                      | C                     | G                     | C                   | 0,058657      | 0,0254       | 0,110208     |
| G                      | A                     | G                     | A                   | 0,0409708     | 0,0066       | 0,116584     |
| A                      | G                     | A                     | G                   | -0,028419     | -0,0064      | 0,342582     |
| T                      | A                     | T                     | A                   | -0,0769611    | 0,0123       | 0,0320261    |
| G                      | A                     | G                     | A                   | -0,0279554    | 0,0009       | 0,334699     |
| G                      | A                     | G                     | A                   | 0,0300218     | 0,0084       | 0,270353     |
| C                      | T                     | C                     | T                   | 0,0333111     | 0,0124       | 0,209524     |
| A                      | T                     | A                     | T                   | -0,0348985    | -0,0108      | 0,381357     |
| T                      | G                     | T                     | G                   | 0,0347809     | 0,0139       | 0,230467     |
| G                      | C                     | G                     | C                   | 0,0459493     | 0,0036       | 0,0933564    |
| T                      | C                     | T                     | C                   | -0,038054     | -0,0086      | 0,214316     |
| T                      | G                     | T                     | G                   | 0,0281629     | 0,009        | 0,316275     |
| C                      | T                     | C                     | T                   | -0,0272062    | 0,0052       | 0,425782     |
| G                      | A                     | G                     | A                   | 0,0360543     | 0,0482       | 0,186186     |
| C                      | A                     | C                     | A                   | -0,036768     | -0,0909      | 0,333704     |
| C                      | T                     | C                     | T                   | -0,0844322    | 0,0899       | 0,0242447    |
| G                      | C                     | G                     | C                   | 0,058657      | 0,26         | 0,110208     |
| G                      | A                     | G                     | A                   | 0,0409708     | 0,0022       | 0,116584     |
| A                      | G                     | A                     | G                   | -0,028419     | 0,0018       | 0,342582     |
| T                      | A                     | T                     | A                   | -0,0769611    | 0,0499       | 0,0320261    |
| G                      | A                     | G                     | A                   | -0,0279554    | 0,0048       | 0,334699     |
| G                      | A                     | G                     | A                   | 0,0300218     | -0,0131      | 0,270353     |
| C                      | T                     | C                     | T                   | 0,0333111     | 0,0099       | 0,209524     |
| A                      | T                     | A                     | T                   | -0,0348985    | -0,035       | 0,381357     |
| T                      | G                     | T                     | G                   | 0,0347809     | 0,0182       | 0,230467     |
| G                      | C                     | G                     | C                   | 0,0459493     | 0,0273       | 0,0933564    |
| A                      | G                     | A                     | G                   | -0,0352976    | -0,1438      | 0,191345     |

|   |   |   |   |            |         |           |
|---|---|---|---|------------|---------|-----------|
| T | C | T | C | -0,038054  | -0,0057 | 0,214316  |
| T | G | T | G | 0,0281629  | 0,0227  | 0,316275  |
| C | T | C | T | -0,0272062 | 0,0007  | 0,425782  |
| G | A | G | A | 0,0360543  | 0,0553  | 0,186186  |
| C | A | C | A | -0,036768  | -0,0182 | 0,333704  |
| C | T | C | T | -0,0844322 | 0,0718  | 0,0242447 |
| G | C | G | C | 0,058657   | 0,2202  | 0,110208  |
| G | A | G | A | 0,0409708  | 0,0223  | 0,116584  |
| A | G | A | G | -0,028419  | -0,0216 | 0,342582  |
| T | A | T | A | -0,0769611 | 0,2045  | 0,0320261 |
| G | A | G | A | -0,0279554 | 0,0426  | 0,334699  |
| G | A | G | A | 0,0300218  | 0,0741  | 0,270353  |
| C | T | C | T | 0,0333111  | -0,0118 | 0,209524  |
| A | T | A | T | -0,0348985 | -0,0471 | 0,381357  |
| T | G | T | G | 0,0347809  | 0,0308  | 0,230467  |
| T | C | T | C | -0,0453606 | -0,1839 | 0,227239  |
| G | C | G | C | 0,0459493  | -0,103  | 0,0933564 |
| A | G | A | G | -0,0352976 | -0,1423 | 0,191345  |
| T | C | T | C | -0,038054  | -0,0174 | 0,214316  |
| T | G | T | G | 0,0281629  | 0,0439  | 0,316275  |
| C | T | C | T | -0,0272062 | 0,0062  | 0,425782  |
| G | A | G | A | 0,0360543  | -0,0463 | 0,186186  |
| C | A | C | A | -0,036768  | -0,0813 | 0,333704  |
| C | T | C | T | -0,0844322 | -0,3168 | 0,0242447 |
| G | C | G | C | 0,058657   | 0,1153  | 0,110208  |
| G | A | G | A | 0,0409708  | 0,0815  | 0,116584  |
| A | G | A | G | -0,028419  | -0,0179 | 0,342582  |
| T | A | T | A | -0,0769611 | -0,2798 | 0,0320261 |
| G | A | G | A | -0,0279554 | -0,1285 | 0,334699  |
| G | A | G | A | 0,0300218  | -0,0212 | 0,270353  |
| C | T | C | T | 0,0333111  | 0,0184  | 0,209524  |
| A | T | A | T | -0,0348985 | 0,0113  | 0,381357  |

|   |   |   |   |            |         |           |
|---|---|---|---|------------|---------|-----------|
| T | G | T | G | 0,0347809  | -0,0281 | 0,230467  |
| G | C | G | C | 0,0459493  | 0,0332  | 0,0933564 |
| A | G | A | G | -0,0352976 | -0,007  | 0,191345  |
| T | C | T | C | -0,038054  | -0,0472 | 0,214316  |
| T | G | T | G | 0,0281629  | 0,0945  | 0,316275  |
| C | T | C | T | -0,0272062 | 0,1132  | 0,425782  |
| G | A | G | A | 0,0360543  | -0,0024 | 0,186186  |
| C | A | C | A | -0,036768  | 0,0078  | 0,333704  |
| C | T | C | T | -0,0844322 | -0,0529 | 0,0242447 |
| G | C | G | C | 0,058657   | 0,1338  | 0,110208  |
| G | A | G | A | 0,0409708  | 0,0064  | 0,116584  |
| A | G | A | G | -0,028419  | -0,0268 | 0,342582  |
| T | A | T | A | -0,0769611 | 0,0414  | 0,0320261 |
| G | A | G | A | -0,0279554 | -0,0042 | 0,334699  |
| G | A | G | A | 0,0300218  | 0,0267  | 0,270353  |
| C | T | C | T | 0,0333111  | 0,0081  | 0,209524  |
| A | T | A | T | -0,0348985 | -0,0527 | 0,381357  |
| T | G | T | G | 0,0347809  | 0,0443  | 0,230467  |
| G | C | G | C | 0,0459493  | -0,0222 | 0,0933564 |
| A | G | A | G | -0,0352976 | -0,0562 | 0,191345  |
| T | C | T | C | -0,038054  | 0,002   | 0,214316  |
| T | G | T | G | 0,0281629  | 0,04    | 0,316275  |
| C | T | C | T | -0,0272062 | 0,0004  | 0,425782  |
| G | A | G | A | 0,0360543  | 0,0074  | 0,186186  |
| C | A | C | A | -0,036768  | 0,0121  | 0,333704  |
| C | T | C | T | -0,0844322 | -0,0355 | 0,0242447 |
| G | C | G | C | 0,058657   | 0,1581  | 0,110208  |
| G | A | G | A | 0,0409708  | -0,0002 | 0,116584  |
| A | G | A | G | -0,028419  | -0,0304 | 0,342582  |
| T | A | T | A | -0,0769611 | 0,0383  | 0,0320261 |
| G | A | G | A | -0,0279554 | 0,0069  | 0,334699  |
| G | A | G | A | 0,0300218  | 0,0269  | 0,270353  |

|   |   |   |   |            |         |            |
|---|---|---|---|------------|---------|------------|
| C | T | C | T | 0,0333111  | 0,003   | 0,209524   |
| A | T | A | T | -0,0348985 | -0,0568 | 0,381357   |
| T | G | T | G | 0,0347809  | 0,0386  | 0,230467   |
| G | C | G | C | 0,0459493  | -0,0275 | 0,0933564  |
| A | G | A | G | -0,0352976 | -0,0505 | 0,191345   |
| T | C | T | C | -0,038054  | 0,0144  | 0,214316   |
| T | G | T | G | 0,0281629  | 0,0279  | 0,316275   |
| C | T | C | T | -0,0272062 | -0,0102 | 0,425782   |
| G | A | G | A | 0,0360543  | -0,0286 | 0,186186   |
| C | A | C | A | -0,036768  | -0,0046 | 0,333704   |
| G | A | G | A | -0,208069  | 0,098   | 0,00325584 |
| T | C | T | C | 0,0243646  | -0,0196 | 0,498365   |
| C | T | C | T | -0,0844322 | -0,0294 | 0,0242447  |
| G | C | G | C | 0,058657   | 0,1255  | 0,110208   |
| T | C | T | C | 0,106482   | -0,2818 | 0,0130424  |
| G | A | G | A | -0,0252294 | -0,0174 | 0,326882   |
| T | C | T | C | 0,0238921  | 0,0402  | 0,494703   |
| G | A | G | A | 0,0409708  | 0,0152  | 0,116584   |
| C | T | C | T | -0,0251824 | -0,0299 | 0,403951   |
| C | A | C | A | 0,0373282  | 0,0301  | 0,136786   |
| G | C | G | C | 0,0377768  | -0,0042 | 0,112165   |
| T | C | T | C | 0,0241589  | -0,016  | 0,426729   |
| A | G | A | G | -0,028419  | -0,0434 | 0,342582   |
| T | C | T | C | -0,0426493 | 0,023   | 0,100259   |
| G | A | G | A | 0,024792   | 0,0169  | 0,480478   |
| G | A | G | A | 0,0277688  | 0,0054  | 0,264158   |
| C | T | C | T | 0,0259197  | 0,0251  | 0,427996   |
| C | T | C | T | 0,0247023  | -0,0089 | 0,449018   |
| T | C | T | C | 0,0258716  | 0,0137  | 0,477374   |
| T | A | T | A | -0,0423234 | -0,0811 | 0,0926798  |
| T | A | T | A | -0,0769611 | 0,1395  | 0,0320261  |
| T | C | T | C | -0,0560452 | -0,0411 | 0,0500616  |

|   |   |   |   |            |         |           |
|---|---|---|---|------------|---------|-----------|
| G | A | G | A | -0,0279554 | 0,0566  | 0,334699  |
| G | A | G | A | 0,0300218  | 0,051   | 0,270353  |
| C | T | C | T | 0,0333111  | -0,0085 | 0,209524  |
| A | T | A | T | -0,0348985 | -0,0692 | 0,381357  |
| T | G | T | G | -0,0256758 | -0,0701 | 0,365529  |
| C | G | C | G | 0,0295997  | 0,0104  | 0,251969  |
| C | T | C | T | 0,0351041  | -0,0306 | 0,148641  |
| C | T | C | T | -0,0359164 | -0,0047 | 0,132981  |
| G | A | G | A | 0,0242298  | 0,025   | 0,483134  |
| T | C | T | C | 0,0260285  | -0,029  | 0,293209  |
| T | C | T | C | -0,0260678 | -0,0282 | 0,388073  |
| A | G | A | G | 0,0364123  | -0,0196 | 0,142365  |
| T | C | T | C | 0,0253588  | 0,0067  | 0,360429  |
| T | G | T | G | 0,0347809  | 0,0436  | 0,230467  |
| C | T | C | T | 0,0266244  | -0,0071 | 0,336365  |
| G | A | G | A | 0,0308548  | -0,0072 | 0,17613   |
| A | G | A | G | -0,0330705 | 0,0005  | 0,157681  |
| G | C | G | C | 0,0459493  | -0,0535 | 0,0933564 |
| A | G | A | G | -0,0352976 | -0,0206 | 0,191345  |
| A | G | A | G | -0,0283244 | 0,0061  | 0,234961  |
| G | T | G | T | 0,0247884  | -0,0343 | 0,364437  |
| A | G | A | G | 0,023868   | 0,0097  | 0,473614  |
| T | C | T | C | -0,038054  | -0,0054 | 0,214316  |
| G | A | G | A | -0,0267268 | -0,0274 | 0,373664  |
| G | A | G | A | 0,0285864  | 0,0619  | 0,237227  |
| A | G | A | G | 0,0310527  | 0,0008  | 0,178585  |
| A | G | A | G | 0,0255081  | 0,008   | 0,325889  |
| T | G | T | G | 0,0596848  | 0,0213  | 0,0409855 |
| T | G | T | G | 0,0281629  | 0,0179  | 0,316275  |
| C | T | C | T | -0,0272062 | -0,0112 | 0,425782  |
| T | C | T | C | 0,0366565  | 0,0303  | 0,140892  |
| G | A | G | A | 0,0360543  | 0,0432  | 0,186186  |



|   |   |   |   |            |              |           |
|---|---|---|---|------------|--------------|-----------|
| C | A | C | A | -0,036768  | 0,0318       | 0,333704  |
| C | T | C | T | -0,0844322 | -0,0474      | 0,0242447 |
| G | C | G | C | 0,058657   | 0,1492       | 0,110208  |
| G | A | G | A | 0,0409708  | -0,0135      | 0,116584  |
| A | G | A | G | -0,028419  | -0,0218      | 0,342582  |
| T | A | T | A | -0,0769611 | -0,09        | 0,0320261 |
| G | A | G | A | -0,0279554 | -0,0548      | 0,334699  |
| G | A | G | A | 0,0300218  | -0,0125      | 0,270353  |
| C | T | C | T | 0,0333111  | 0,0196       | 0,209524  |
| A | T | A | T | -0,0348985 | -0,0438      | 0,381357  |
| T | G | T | G | 0,0347809  | 0,032        | 0,230467  |
| G | C | G | C | 0,0459493  | 0,0114       | 0,0933564 |
| A | G | A | G | -0,0352976 | -0,0875      | 0,191345  |
| T | C | T | C | -0,038054  | 0,0287       | 0,214316  |
| T | G | T | G | 0,0281629  | 0,0477       | 0,316275  |
| C | T | C | T | -0,0272062 | -0,0041      | 0,425782  |
| G | A | G | A | 0,0360543  | 0,0105715    | 0,186186  |
| C | A | C | A | -0,036768  | -0,00630682  | 0,333704  |
| C | T | C | T | -0,0844322 | -0,0109507   | 0,0242447 |
| G | C | G | C | 0,058657   | 0,0230071    | 0,110208  |
| A | T | A | T | -0,0322529 | -0,00553128  | 0,273445  |
| G | A | G | A | 0,0409708  | -0,000648317 | 0,116584  |
| A | G | A | G | -0,028419  | -0,0136593   | 0,342582  |
| T | A | T | A | -0,0769611 | 0,000489299  | 0,0320261 |
| G | A | G | A | -0,0279554 | 0,00514858   | 0,334699  |
| G | A | G | A | 0,0300218  | 0,00479296   | 0,270353  |
| C | T | C | T | 0,0333111  | 0,0252733    | 0,209524  |
| A | T | A | T | -0,0348985 | -0,023216    | 0,381357  |
| T | G | T | G | 0,0347809  | -0,00512607  | 0,230467  |
| G | C | G | C | 0,0459493  | 0,000956817  | 0,0933564 |
| A | G | A | G | -0,0352976 | -0,00398298  | 0,191345  |
| T | C | T | C | -0,038054  | -0,018291    | 0,214316  |

|   |   |   |   |            |              |            |
|---|---|---|---|------------|--------------|------------|
| T | G | T | G | 0,0281629  | 0,0197405    | 0,316275   |
| C | T | C | T | -0,0272062 | -0,022725    | 0,425782   |
| G | A | G | A | 0,0360543  | -0,000153066 | 0,186186   |
| C | A | C | A | -0,036768  | -4,49087E-05 | 0,333704   |
| C | T | C | T | -0,0844322 | -0,000580345 | 0,0242447  |
| G | C | G | C | 0,058657   | 7,35751E-05  | 0,110208   |
| A | T | A | T | -0,0322529 | -9,36976E-05 | 0,273445   |
| G | A | G | A | 0,0409708  | -0,000139297 | 0,116584   |
| A | G | A | G | -0,028419  | 0,000139731  | 0,342582   |
| T | A | T | A | -0,0769611 | 0,00008952   | 0,0320261  |
| G | A | G | A | -0,0279554 | -7,17822E-05 | 0,334699   |
| G | A | G | A | 0,0300218  | 3,91133E-05  | 0,270353   |
| C | T | C | T | 0,0333111  | 0,000271529  | 0,209524   |
| A | T | A | T | -0,0348985 | -5,73318E-05 | 0,381357   |
| T | G | T | G | 0,0347809  | 0,000145894  | 0,230467   |
| G | C | G | C | 0,0459493  | 0,000179162  | 0,0933564  |
| A | G | A | G | -0,0352976 | 0,000032598  | 0,191345   |
| T | C | T | C | -0,038054  | 5,81648E-05  | 0,214316   |
| T | G | T | G | 0,0281629  | 0,000084654  | 0,316275   |
| C | T | C | T | -0,0272062 | -1,06266E-05 | 0,425782   |
| G | A | G | A | -0,208069  | 0,115374     | 0,00325584 |
| C | T | C | T | -0,0844322 | -0,0536951   | 0,0242447  |
| G | C | G | C | 0,058657   | 0,0612437    | 0,110208   |
| G | A | G | A | 0,0409708  | -0,0288533   | 0,116584   |
| C | T | C | T | -0,0251824 | -0,00842338  | 0,403951   |
| C | A | C | A | 0,0373282  | -0,00743356  | 0,136786   |
| G | C | G | C | 0,0377768  | 0,0161558    | 0,112165   |
| T | C | T | C | 0,0241589  | -0,0166498   | 0,426729   |
| A | G | A | G | -0,028419  | -0,0149055   | 0,342582   |
| T | C | T | C | -0,0426493 | -0,00630987  | 0,100259   |
| G | A | G | A | 0,024792   | 0,013463     | 0,480478   |
| G | A | G | A | 0,0277688  | -0,00612271  | 0,264158   |

|   |   |   |   |            |              |           |
|---|---|---|---|------------|--------------|-----------|
| C | T | C | T | 0,0247023  | -0,000237028 | 0,449018  |
| T | A | T | A | -0,0423234 | -0,0339891   | 0,0926798 |
| T | C | T | C | -0,0560452 | -0,0282462   | 0,0500616 |
| G | A | G | A | -0,0279554 | -0,0106343   | 0,334699  |
| G | A | G | A | 0,0300218  | 0,00546106   | 0,270353  |
| C | T | C | T | 0,0333111  | 0,028397     | 0,209524  |
| T | G | T | G | -0,0256758 | 0,00158774   | 0,365529  |
| C | G | C | G | 0,0295997  | 0,0111575    | 0,251969  |
| C | T | C | T | 0,0351041  | 0,000535856  | 0,148641  |
| G | A | G | A | 0,0242298  | 0,00590453   | 0,483134  |
| T | C | T | C | 0,0260285  | -0,00181665  | 0,293209  |
| T | C | T | C | -0,0260678 | 0,00129017   | 0,388073  |
| A | G | A | G | 0,0364123  | -0,017139    | 0,142365  |
| T | C | T | C | 0,0253588  | -0,0217161   | 0,360429  |
| T | G | T | G | 0,0347809  | 0,00878827   | 0,230467  |
| A | G | A | G | -0,0352976 | -0,0277803   | 0,191345  |
| A | G | A | G | -0,0283244 | -0,0148385   | 0,234961  |
| G | T | G | T | 0,0247884  | -0,00121974  | 0,364437  |
| A | G | A | G | 0,023868   | 0,00750874   | 0,473614  |
| T | C | T | C | -0,038054  | -0,00957671  | 0,214316  |
| A | G | A | G | 0,0310527  | 0,0259952    | 0,178585  |
| T | G | T | G | 0,0596848  | 0,0318378    | 0,0409855 |
| T | G | T | G | 0,0281629  | 0,00535364   | 0,316275  |
| C | T | C | T | -0,0272062 | 0,00428182   | 0,425782  |
| T | C | T | C | 0,0366565  | 0,00693688   | 0,140892  |
| G | A | G | A | 0,0360543  | 0,0191711    | 0,186186  |
| C | A | C | A | -0,036768  | -0,0238153   | 0,333704  |
| T | C | T | C | 0,0243646  | -0,0210597   | 0,498365  |
| C | T | C | T | -0,0844322 | -0,0940217   | 0,0242447 |
| A | T | A | T | -0,0322529 | -0,0373551   | 0,273445  |
| C | T | C | T | -0,0251824 | -0,00201503  | 0,403951  |
| C | A | C | A | 0,0373282  | 0,0105749    | 0,136786  |

|   |   |   |   |            |              |            |
|---|---|---|---|------------|--------------|------------|
| T | C | T | C | 0,0241589  | 0,0123563    | 0,426729   |
| A | G | A | G | -0,028419  | 0,0231636    | 0,342582   |
| G | A | G | A | 0,0277688  | -0,0020962   | 0,264158   |
| T | A | T | A | -0,0769611 | 0,0847951    | 0,0320261  |
| T | C | T | C | -0,0560452 | -0,0359008   | 0,0500616  |
| G | A | G | A | -0,0279554 | 0,0213367    | 0,334699   |
| C | T | C | T | 0,0333111  | 0,038912     | 0,209524   |
| A | T | A | T | -0,0348985 | 0,00971565   | 0,381357   |
| T | G | T | G | -0,0256758 | -0,0204231   | 0,365529   |
| T | A | T | A | -0,025676  | -0,0204701   | 0,361487   |
| C | T | C | T | 0,0351041  | 0,0213906    | 0,148641   |
| C | T | C | T | -0,0359164 | -0,00502561  | 0,132981   |
| G | A | G | A | 0,0242298  | -0,00907304  | 0,483134   |
| T | C | T | C | 0,0260285  | -0,000933436 | 0,293209   |
| T | C | T | C | -0,0260678 | -0,00529399  | 0,388073   |
| A | G | A | G | 0,0364123  | 0,0273457    | 0,142365   |
| T | G | T | G | 0,0347809  | -0,0194275   | 0,230467   |
| C | T | C | T | 0,0266244  | -0,0228705   | 0,336365   |
| G | A | G | A | 0,0308548  | -0,00058317  | 0,17613    |
| A | G | A | G | -0,0330705 | 0,0228079    | 0,157681   |
| A | G | A | G | -0,0352976 | 0,00720796   | 0,191345   |
| G | T | G | T | 0,0247884  | -0,00262344  | 0,364437   |
| T | C | T | C | -0,038054  | -0,0115009   | 0,214316   |
| G | A | G | A | 0,0285864  | 0,00859991   | 0,237227   |
| A | G | A | G | 0,0310527  | -0,00506983  | 0,178585   |
| A | G | A | G | 0,0255081  | 0,0036852    | 0,325889   |
| T | G | T | G | 0,0596848  | 0,0110102    | 0,0409855  |
| C | T | C | T | -0,0272062 | -0,00284304  | 0,425782   |
| T | C | T | C | 0,0366565  | -0,0145392   | 0,140892   |
| G | A | G | A | 0,0360543  | 0,0218036    | 0,186186   |
| G | A | G | A | -0,208069  | -0,0116091   | 0,00325584 |
| T | C | T | C | 0,0243646  | 0,0144631    | 0,498365   |

|   |   |   |   |            |              |           |
|---|---|---|---|------------|--------------|-----------|
| C | T | C | T | -0,0844322 | -0,0292095   | 0,0242447 |
| A | T | A | T | -0,0322529 | -0,00804729  | 0,273445  |
| G | A | G | A | 0,0409708  | -0,0287318   | 0,116584  |
| C | T | C | T | -0,0251824 | -0,0167261   | 0,403951  |
| C | A | C | A | 0,0373282  | -0,00673563  | 0,136786  |
| G | C | G | C | 0,0377768  | -0,00120973  | 0,112165  |
| T | C | T | C | 0,0241589  | -0,00525076  | 0,426729  |
| A | G | A | G | -0,028419  | -0,00705483  | 0,342582  |
| G | A | G | A | 0,024792   | 0,0248663    | 0,480478  |
| G | A | G | A | 0,0277688  | -0,000388075 | 0,264158  |
| C | T | C | T | 0,0247023  | -0,0181792   | 0,449018  |
| T | C | T | C | 0,0258716  | 0,0316023    | 0,477374  |
| T | A | T | A | -0,0423234 | -0,0229514   | 0,0926798 |
| T | A | T | A | -0,0769611 | -0,0141304   | 0,0320261 |
| T | C | T | C | -0,0560452 | -0,0460942   | 0,0500616 |
| G | A | G | A | -0,0279554 | -0,0211971   | 0,334699  |
| C | T | C | T | 0,0333111  | 0,0297355    | 0,209524  |
| A | T | A | T | -0,0348985 | -0,0440794   | 0,381357  |
| T | G | T | G | -0,0256758 | 6,49979E-05  | 0,365529  |
| T | A | T | A | -0,025676  | -0,0133568   | 0,361487  |
| C | T | C | T | 0,0351041  | 0,00482633   | 0,148641  |
| G | A | G | A | 0,0242298  | -0,0177771   | 0,483134  |
| T | C | T | C | 0,0260285  | -0,0127996   | 0,293209  |
| T | C | T | C | -0,0260678 | -0,0287287   | 0,388073  |
| A | G | A | G | 0,0364123  | -0,00470103  | 0,142365  |
| T | C | T | C | 0,0253588  | -0,0227488   | 0,360429  |
| T | G | T | G | 0,0347809  | 0,0142904    | 0,230467  |
| C | T | C | T | 0,0266244  | 0,00498754   | 0,336365  |
| A | G | A | G | -0,0330705 | -0,0315165   | 0,157681  |
| G | C | G | C | 0,0459493  | -0,0184053   | 0,0933564 |
| A | G | A | G | -0,0352976 | -0,018713    | 0,191345  |
| A | G | A | G | -0,0283244 | -0,00839413  | 0,234961  |

|   |   |   |   |            |            |           |
|---|---|---|---|------------|------------|-----------|
| G | T | G | T | 0,0247884  | -0,0157209 | 0,364437  |
| A | G | A | G | 0,023868   | 0,0103146  | 0,473614  |
| T | C | T | C | -0,038054  | 0,0202339  | 0,214316  |
| G | A | G | A | 0,0285864  | 0,00381471 | 0,237227  |
| A | G | A | G | 0,0310527  | -0,0154172 | 0,178585  |
| T | G | T | G | 0,0596848  | -0,031405  | 0,0409855 |
| C | T | C | T | -0,0272062 | 0,00238116 | 0,425782  |
| T | C | T | C | 0,0366565  | 0,0251481  | 0,140892  |

---

| <b>eaf.outcome</b> | <b>se.exposure</b> | <b>se.outcome</b> | <b>pval.exposure</b> | <b>pval.outcome</b> | <b>F</b> |
|--------------------|--------------------|-------------------|----------------------|---------------------|----------|
| 0,3279             | 0,0067914          | 0,0071            | 1,10343E-07          | 0,554201            | 145,65   |
| 0,3569             | 0,00547216         | 0,0069            | 1,8284E-11           | 0,3655              | 233,71   |
| 0,01957            | 0,0167047          | 0,024             | 4,31733E-07          | 0,739301            | 131,48   |
| 0,03256            | 0,00823623         | 0,0188            | 1,06507E-12          | 0,1764              | 261,65   |
| 0,1482             | 0,00802224         | 0,0093            | 3,27047E-07          | 0,4778              | 134,55   |
| 0,3133             | 0,00549191         | 0,0072            | 2,28278E-07          | 0,3712              | 138,34   |
| 0,01288            | 0,0147306          | 0,0296            | 1,74561E-07          | 0,6783              | 141,29   |
| 0,2604             | 0,00544061         | 0,0075            | 2,77262E-07          | 0,9068              | 136,25   |
| 0,2558             | 0,00591995         | 0,0076            | 3,95134E-07          | 0,2703              | 133,07   |
| 0,2251             | 0,00630708         | 0,0079            | 1,28103E-07          | 0,1177              | 143,67   |
| 0,3625             | 0,00530438         | 0,0069            | 4,73059E-11          | 0,1163              | 223,84   |
| 0,2046             | 0,00629715         | 0,0083            | 3,32745E-08          | 0,09378             | 157,19   |
| 0,06698            | 0,00885138         | 0,0133            | 2,08938E-07          | 0,784401            | 139,08   |
| 0,1838             | 0,00628848         | 0,0085            | 1,43603E-09          | 0,3118              | 188,88   |
| 0,3079             | 0,00553787         | 0,0072            | 3,66622E-07          | 0,2077              | 133,58   |
| 0,5142             | 0,00523984         | 0,0067            | 2,07845E-07          | 0,4327              | 139,29   |
| 0,3286             | 0,0067914          | 0,0521            | 1,10343E-07          | 0,3552              | 145,65   |
| 0,3565             | 0,00547216         | 0,0508            | 1,8284E-11           | 0,0735005           | 233,71   |
| 0,01971            | 0,0167047          | 0,173             | 4,31733E-07          | 0,6033              | 131,48   |
| 0,0326             | 0,00823623         | 0,1367            | 1,06507E-12          | 0,0572005           | 261,65   |
| 0,1481             | 0,00802224         | 0,0679            | 3,27047E-07          | 0,9743              | 134,55   |
| 0,314              | 0,00549191         | 0,0523            | 2,28278E-07          | 0,9728              | 138,34   |
| 0,01289            | 0,0147306          | 0,2174            | 1,74561E-07          | 0,8183              | 141,29   |
| 0,2598             | 0,00544061         | 0,0553            | 2,77262E-07          | 0,9315              | 136,25   |
| 0,2552             | 0,00591995         | 0,056             | 3,95134E-07          | 0,8148              | 133,07   |
| 0,2246             | 0,00630708         | 0,0582            | 1,28103E-07          | 0,8654              | 143,67   |
| 0,3643             | 0,00530438         | 0,0504            | 4,73059E-11          | 0,487               | 223,84   |
| 0,2029             | 0,00629715         | 0,0607            | 3,32745E-08          | 0,764401            | 157,19   |
| 0,06681            | 0,00885138         | 0,0973            | 2,08938E-07          | 0,779399            | 139,08   |
| 0,1938             | 0,00650188         | 0,0611            | 5,67258E-08          | 0,0186599           | 150,87   |

|         |            |        |             |           |        |
|---------|------------|--------|-------------|-----------|--------|
| 0,1844  | 0,00628848 | 0,0626 | 1,43603E-09 | 0,9268    | 188,88 |
| 0,307   | 0,00553787 | 0,0525 | 3,66622E-07 | 0,6655    | 133,58 |
| 0,5137  | 0,00523984 | 0,0487 | 2,07845E-07 | 0,9884    | 139,29 |
| 0,3278  | 0,0067914  | 0,0485 | 1,10343E-07 | 0,2544    | 145,65 |
| 0,3569  | 0,00547216 | 0,0471 | 1,8284E-11  | 0,6995    | 233,71 |
| 0,01961 | 0,0167047  | 0,1611 | 4,31733E-07 | 0,655901  | 131,48 |
| 0,03248 | 0,00823623 | 0,1252 | 1,06507E-12 | 0,0787209 | 261,65 |
| 0,148   | 0,00802224 | 0,0636 | 3,27047E-07 | 0,7264    | 134,55 |
| 0,3137  | 0,00549191 | 0,0486 | 2,28278E-07 | 0,6566    | 138,34 |
| 0,013   | 0,0147306  | 0,1936 | 1,74561E-07 | 0,2908    | 141,29 |
| 0,2608  | 0,00544061 | 0,0513 | 2,77262E-07 | 0,406     | 136,25 |
| 0,2556  | 0,00591995 | 0,0519 | 3,95134E-07 | 0,1533    | 133,07 |
| 0,2244  | 0,00630708 | 0,0544 | 1,28103E-07 | 0,8287    | 143,67 |
| 0,3632  | 0,00530438 | 0,0468 | 4,73059E-11 | 0,3146    | 223,84 |
| 0,2043  | 0,00629715 | 0,056  | 3,32745E-08 | 0,5825    | 157,19 |
| 0,2869  | 0,0061354  | 0,0499 | 1,4327E-13  | 0,0002262 | 283,46 |
| 0,06689 | 0,00885138 | 0,0899 | 2,08938E-07 | 0,2521    | 139,08 |
| 0,193   | 0,00650188 | 0,0568 | 5,67258E-08 | 0,01217   | 150,87 |
| 0,1841  | 0,00628848 | 0,0582 | 1,43603E-09 | 0,764401  | 188,88 |
| 0,3069  | 0,00553787 | 0,0488 | 3,66622E-07 | 0,3689    | 133,58 |
| 0,5143  | 0,00523984 | 0,0453 | 2,07845E-07 | 0,891     | 139,29 |
| 0,3277  | 0,0067914  | 0,0596 | 1,10343E-07 | 0,4372    | 145,65 |
| 0,3569  | 0,00547216 | 0,058  | 1,8284E-11  | 0,1607    | 233,71 |
| 0,01958 | 0,0167047  | 0,2033 | 4,31733E-07 | 0,1191    | 131,48 |
| 0,03244 | 0,00823623 | 0,1578 | 1,06507E-12 | 0,4649    | 261,65 |
| 0,148   | 0,00802224 | 0,0782 | 3,27047E-07 | 0,297     | 134,55 |
| 0,3137  | 0,00549191 | 0,0599 | 2,28278E-07 | 0,7652    | 138,34 |
| 0,01297 | 0,0147306  | 0,2499 | 1,74561E-07 | 0,2629    | 141,29 |
| 0,2607  | 0,00544061 | 0,0632 | 2,77262E-07 | 0,0420901 | 136,25 |
| 0,2555  | 0,00591995 | 0,064  | 3,95134E-07 | 0,7403    | 133,07 |
| 0,2244  | 0,00630708 | 0,0668 | 1,28103E-07 | 0,7833    | 143,67 |
| 0,3633  | 0,00530438 | 0,0577 | 4,73059E-11 | 0,845     | 223,84 |



|         |            |        |             |            |        |
|---------|------------|--------|-------------|------------|--------|
| 0,2042  | 0,00629715 | 0,0695 | 3,32745E-08 | 0,686099   | 157,19 |
| 0,06692 | 0,00885138 | 0,1106 | 2,08938E-07 | 0,763901   | 139,08 |
| 0,1931  | 0,00650188 | 0,07   | 5,67258E-08 | 0,9207     | 150,87 |
| 0,184   | 0,00628848 | 0,0714 | 1,43603E-09 | 0,5081     | 188,88 |
| 0,307   | 0,00553787 | 0,0601 | 3,66622E-07 | 0,1161     | 133,58 |
| 0,5143  | 0,00523984 | 0,0557 | 2,07845E-07 | 0,0422202  | 139,29 |
| 0,3277  | 0,0067914  | 0,0199 | 1,10343E-07 | 0,9046     | 145,65 |
| 0,3569  | 0,00547216 | 0,0194 | 1,8284E-11  | 0,6863     | 233,71 |
| 0,01956 | 0,0167047  | 0,0674 | 4,31733E-07 | 0,4327     | 131,48 |
| 0,03257 | 0,00823623 | 0,0524 | 1,06507E-12 | 0,01071    | 261,65 |
| 0,148   | 0,00802224 | 0,0262 | 3,27047E-07 | 0,8085     | 134,55 |
| 0,3135  | 0,00549191 | 0,0201 | 2,28278E-07 | 0,1811     | 138,34 |
| 0,013   | 0,0147306  | 0,0825 | 1,74561E-07 | 0,6159     | 141,29 |
| 0,2607  | 0,00544061 | 0,0211 | 2,77262E-07 | 0,8416     | 136,25 |
| 0,2556  | 0,00591995 | 0,0214 | 3,95134E-07 | 0,2133     | 133,07 |
| 0,2245  | 0,00630708 | 0,0223 | 1,28103E-07 | 0,7154     | 143,67 |
| 0,3629  | 0,00530438 | 0,0193 | 4,73059E-11 | 0,006364   | 223,84 |
| 0,2044  | 0,00629715 | 0,0232 | 3,32745E-08 | 0,0568997  | 157,19 |
| 0,0669  | 0,00885138 | 0,037  | 2,08938E-07 | 0,5488     | 139,08 |
| 0,1928  | 0,00650188 | 0,0235 | 5,67258E-08 | 0,01685    | 150,87 |
| 0,1841  | 0,00628848 | 0,0239 | 1,43603E-09 | 0,9337     | 188,88 |
| 0,3072  | 0,00553787 | 0,0201 | 3,66622E-07 | 0,0464601  | 133,58 |
| 0,5142  | 0,00523984 | 0,0186 | 2,07845E-07 | 0,9815     | 139,29 |
| 0,3279  | 0,0067914  | 0,0204 | 1,10343E-07 | 0,716901   | 145,65 |
| 0,3569  | 0,00547216 | 0,0199 | 1,8284E-11  | 0,5427     | 233,71 |
| 0,01957 | 0,0167047  | 0,0693 | 4,31733E-07 | 0,608199   | 131,48 |
| 0,03256 | 0,00823623 | 0,0535 | 1,06507E-12 | 0,00310099 | 261,65 |
| 0,1482  | 0,00802224 | 0,0268 | 3,27047E-07 | 0,9946     | 134,55 |
| 0,3133  | 0,00549191 | 0,0205 | 2,28278E-07 | 0,1384     | 138,34 |
| 0,01288 | 0,0147306  | 0,0847 | 1,74561E-07 | 0,6511     | 141,29 |
| 0,2604  | 0,00544061 | 0,0217 | 2,77262E-07 | 0,7484     | 136,25 |
| 0,2558  | 0,00591995 | 0,0219 | 3,95134E-07 | 0,2206     | 133,07 |

|          |            |        |             |            |        |
|----------|------------|--------|-------------|------------|--------|
| 0,2251   | 0,00630708 | 0,0228 | 1,28103E-07 | 0,8951     | 143,67 |
| 0,3625   | 0,00530438 | 0,0198 | 4,73059E-11 | 0,00408799 | 223,84 |
| 0,2046   | 0,00629715 | 0,0238 | 3,32745E-08 | 0,1055     | 157,19 |
| 0,06698  | 0,00885138 | 0,0379 | 2,08938E-07 | 0,4685     | 139,08 |
| 0,192    | 0,00650188 | 0,0241 | 5,67258E-08 | 0,0361102  | 150,87 |
| 0,1838   | 0,00628848 | 0,0245 | 1,43603E-09 | 0,5549     | 188,88 |
| 0,3079   | 0,00553787 | 0,0206 | 3,66622E-07 | 0,1748     | 133,58 |
| 0,5142   | 0,00523984 | 0,0191 | 2,07845E-07 | 0,5931     | 139,29 |
| 0,3278   | 0,0067914  | 0,0267 | 1,10343E-07 | 0,2835     | 145,65 |
| 0,3568   | 0,00547216 | 0,026  | 1,8284E-11  | 0,8582     | 233,71 |
| 0,0251   | 0,0454511  | 0,0792 | 4,69744E-06 | 0,2156     | 109,12 |
| 0,5058   | 0,0051599  | 0,0249 | 2,33637E-06 | 0,4316     | 114,78 |
| 0,01959  | 0,0167047  | 0,0906 | 4,31733E-07 | 0,745901   | 131,48 |
| 0,03248  | 0,00823623 | 0,0708 | 1,06507E-12 | 0,0760694  | 261,65 |
| 0,002037 | 0,0226212  | 0,2848 | 2,51151E-06 | 0,3226     | 114,46 |
| 0,3597   | 0,00551762 | 0,0261 | 4,81907E-06 | 0,5043     | 107,6  |
| 0,5104   | 0,00512668 | 0,0249 | 3,1567E-06  | 0,1064     | 111,9  |
| 0,1482   | 0,00802224 | 0,0351 | 3,27047E-07 | 0,665301   | 134,55 |
| 0,3221   | 0,00534652 | 0,0269 | 2,47648E-06 | 0,2661     | 114,74 |
| 0,1715   | 0,00745231 | 0,033  | 5,47314E-07 | 0,3616     | 128,65 |
| 0,09716  | 0,0082016  | 0,0422 | 4,10425E-06 | 0,921      | 108,94 |
| 0,4629   | 0,00523696 | 0,025  | 3,96588E-06 | 0,5241     | 109,98 |
| 0,3133   | 0,00549191 | 0,027  | 2,28278E-07 | 0,1073     | 138,34 |
| 0,2773   | 0,00860563 | 0,0278 | 7,19695E-07 | 0,4079     | 126,75 |
| 0,4531   | 0,00514647 | 0,0251 | 1,45525E-06 | 0,5011     | 119,8  |
| 0,2591   | 0,00588847 | 0,0285 | 2,40776E-06 | 0,8493     | 114,74 |
| 0,3746   | 0,00520724 | 0,0258 | 6,43688E-07 | 0,3307     | 127,78 |
| 0,4562   | 0,00519588 | 0,025  | 1,99226E-06 | 0,7212     | 117,14 |
| 0,4624   | 0,0051675  | 0,025  | 5,54023E-07 | 0,583001   | 129,63 |
| 0,103    | 0,0089572  | 0,0411 | 2,30041E-06 | 0,0483504  | 115,86 |
| 0,01289  | 0,0147306  | 0,1119 | 1,74561E-07 | 0,2123     | 141,29 |
| 0,1413   | 0,0118232  | 0,0359 | 2,13436E-06 | 0,2526     | 116,41 |

|         |            |        |             |            |        |
|---------|------------|--------|-------------|------------|--------|
| 0,2605  | 0,00544061 | 0,0283 | 2,77262E-07 | 0,04583    | 136,25 |
| 0,2558  | 0,00591995 | 0,0287 | 3,95134E-07 | 0,0754102  | 133,07 |
| 0,2251  | 0,00630708 | 0,0298 | 1,28103E-07 | 0,7743     | 143,67 |
| 0,3626  | 0,00530438 | 0,0259 | 4,73059E-11 | 0,00758193 | 223,84 |
| 0,3177  | 0,0053782  | 0,0268 | 1,80548E-06 | 0,00885095 | 117,64 |
| 0,3071  | 0,00596416 | 0,0271 | 6,94393E-07 | 0,7012     | 127,29 |
| 0,2713  | 0,00720811 | 0,028  | 1,11551E-06 | 0,2754     | 122,29 |
| 0,1187  | 0,00759621 | 0,0388 | 2,26511E-06 | 0,904      | 115,05 |
| 0,4078  | 0,00515976 | 0,0253 | 2,65418E-06 | 0,3246     | 113,48 |
| 0,3039  | 0,0056781  | 0,027  | 4,56121E-06 | 0,2824     | 108,53 |
| 0,381   | 0,00528782 | 0,0256 | 8,23208E-07 | 0,2712     | 125,29 |
| 0,1361  | 0,00744654 | 0,0366 | 1,00922E-06 | 0,5924     | 123,35 |
| 0,3467  | 0,00539032 | 0,0262 | 2,5449E-06  | 0,7984     | 114,01 |
| 0,2045  | 0,00629715 | 0,0312 | 3,32745E-08 | 0,1623     | 157,19 |
| 0,4001  | 0,00543121 | 0,0255 | 9,48143E-07 | 0,7796     | 124,09 |
| 0,229   | 0,00674275 | 0,0296 | 4,73962E-06 | 0,8076     | 108,26 |
| 0,1432  | 0,00708759 | 0,0356 | 3,07171E-06 | 0,9885     | 112,79 |
| 0,06696 | 0,00885138 | 0,0496 | 2,08938E-07 | 0,2809     | 139,08 |
| 0,1922  | 0,00650188 | 0,0316 | 5,67258E-08 | 0,514      | 150,87 |
| 0,2956  | 0,0060781  | 0,0273 | 3,16088E-06 | 0,8241     | 112,13 |
| 0,3313  | 0,00541762 | 0,0266 | 4,75044E-06 | 0,1968     | 107,98 |
| 0,4475  | 0,00518301 | 0,025  | 4,12362E-06 | 0,6995     | 109,55 |
| 0,1837  | 0,00628848 | 0,032  | 1,43603E-09 | 0,8654     | 188,88 |
| 0,3085  | 0,00531236 | 0,027  | 4,87795E-07 | 0,3092     | 131,05 |
| 0,2502  | 0,00603038 | 0,0287 | 2,13305E-06 | 0,03093    | 115,75 |
| 0,2136  | 0,00672387 | 0,0303 | 3,86923E-06 | 0,9802     | 110,22 |
| 0,2981  | 0,00548864 | 0,0272 | 3,36101E-06 | 0,767499   | 111,32 |
| 0,126   | 0,0129749  | 0,0375 | 4,22478E-06 | 0,5707     | 109,13 |
| 0,3078  | 0,00553787 | 0,0269 | 3,66622E-07 | 0,5061     | 133,58 |
| 0,5143  | 0,00523984 | 0,025  | 2,07845E-07 | 0,6549     | 139,29 |
| 0,1561  | 0,00738691 | 0,0343 | 6,9643E-07  | 0,3778     | 127,04 |
| 0,328   | 0,0067914  | 0,029  | 1,10343E-07 | 0,1371     | 145,65 |

|           |            |           |             |            |        |
|-----------|------------|-----------|-------------|------------|--------|
| 0,357     | 0,00547216 | 0,0282    | 1,8284E-11  | 0,2593     | 233,71 |
| 0,01958   | 0,0167047  | 0,0984    | 4,31733E-07 | 0,6296     | 131,48 |
| 0,03251   | 0,00823623 | 0,075     | 1,06507E-12 | 0,0467003  | 261,65 |
| 0,1481    | 0,00802224 | 0,0382    | 3,27047E-07 | 0,724499   | 134,55 |
| 0,3135    | 0,00549191 | 0,0291    | 2,28278E-07 | 0,4543     | 138,34 |
| 0,01286   | 0,0147306  | 0,1189    | 1,74561E-07 | 0,4492     | 141,29 |
| 0,2602    | 0,00544061 | 0,0308    | 2,77262E-07 | 0,0752905  | 136,25 |
| 0,2556    | 0,00591995 | 0,0311    | 3,95134E-07 | 0,6886     | 133,07 |
| 0,2251    | 0,00630708 | 0,0325    | 1,28103E-07 | 0,5464     | 143,67 |
| 0,3627    | 0,00530438 | 0,0281    | 4,73059E-11 | 0,1185     | 223,84 |
| 0,2045    | 0,00629715 | 0,0338    | 3,32745E-08 | 0,3442     | 157,19 |
| 0,06702   | 0,00885138 | 0,0538    | 2,08938E-07 | 0,8317     | 139,08 |
| 0,1921    | 0,00650188 | 0,0341    | 5,67258E-08 | 0,01034    | 150,87 |
| 0,1838    | 0,00628848 | 0,0348    | 1,43603E-09 | 0,4088     | 188,88 |
| 0,3079    | 0,00553787 | 0,0293    | 3,66622E-07 | 0,1031     | 133,58 |
| 0,5143    | 0,00523984 | 0,0271    | 2,07845E-07 | 0,8797     | 139,29 |
| 0,194699  | 0,0067914  | 0,008424  | 1,10343E-07 | 0,209506   | 145,65 |
| 0,334673  | 0,00547216 | 0,0069312 | 1,8284E-11  | 0,362865   | 233,71 |
| 0,0257773 | 0,0167047  | 0,0209182 | 4,31733E-07 | 0,600624   | 131,48 |
| 0,112898  | 0,00823623 | 0,0103593 | 1,06507E-12 | 0,0263572  | 261,65 |
| 0,27324   | 0,00579587 | 0,0073474 | 2,62457E-08 | 0,451561   | 160,31 |
| 0,117531  | 0,00802224 | 0,0101532 | 3,27047E-07 | 0,949087   | 134,55 |
| 0,344744  | 0,00549191 | 0,0069175 | 2,28278E-07 | 0,0483114  | 138,34 |
| 0,036838  | 0,0147306  | 0,017925  | 1,74561E-07 | 0,978223   | 141,29 |
| 0,336879  | 0,00544061 | 0,0069046 | 2,77262E-07 | 0,455867   | 136,25 |
| 0,274795  | 0,00591995 | 0,007417  | 3,95134E-07 | 0,518143   | 133,07 |
| 0,210525  | 0,00630708 | 0,0079965 | 1,28103E-07 | 0,00157474 | 143,67 |
| 0,382741  | 0,00530438 | 0,0067197 | 4,73059E-11 | 0,00055052 | 223,84 |
| 0,241366  | 0,00629715 | 0,0077842 | 3,32745E-08 | 0,510203   | 157,19 |
| 0,0949792 | 0,00885138 | 0,0111863 | 2,08938E-07 | 0,931836   | 139,08 |
| 0,190447  | 0,00650188 | 0,0083163 | 5,67258E-08 | 0,631985   | 150,87 |
| 0,216833  | 0,00628848 | 0,0079364 | 1,43603E-09 | 0,0211836  | 188,88 |

|           |            |           |             |            |        |
|-----------|------------|-----------|-------------|------------|--------|
| 0,315665  | 0,00553787 | 0,0070337 | 3,66622E-07 | 0,00500714 | 133,58 |
| 0,427043  | 0,00523984 | 0,0066256 | 2,07845E-07 | 0,00060385 | 139,29 |
| 0,194712  | 0,0067914  | 0,0001494 | 1,10343E-07 | 0,31       | 145,65 |
| 0,334533  | 0,00547216 | 0,0001229 | 1,8284E-11  | 0,709999   | 233,71 |
| 0,025641  | 0,0167047  | 0,0003722 | 4,31733E-07 | 0,12       | 131,48 |
| 0,112301  | 0,00823623 | 0,0001844 | 1,06507E-12 | 0,69       | 261,65 |
| 0,274267  | 0,00579587 | 0,0001302 | 2,62457E-08 | 0,47       | 160,31 |
| 0,118142  | 0,00802224 | 0,0001798 | 3,27047E-07 | 0,44       | 134,55 |
| 0,344967  | 0,00549191 | 0,0001227 | 2,28278E-07 | 0,25       | 138,34 |
| 0,036755  | 0,0147306  | 0,0003182 | 1,74561E-07 | 0,780001   | 141,29 |
| 0,334775  | 0,00544061 | 0,0001226 | 2,77262E-07 | 0,56       | 136,25 |
| 0,275071  | 0,00591995 | 0,0001315 | 3,95134E-07 | 0,77       | 133,07 |
| 0,210178  | 0,00630708 | 0,0001421 | 1,28103E-07 | 0,0560003  | 143,67 |
| 0,381744  | 0,00530438 | 0,0001192 | 4,73059E-11 | 0,630001   | 223,84 |
| 0,240721  | 0,00629715 | 0,0001382 | 3,32745E-08 | 0,29       | 157,19 |
| 0,095115  | 0,00885138 | 0,0001982 | 2,08938E-07 | 0,37       | 139,08 |
| 0,191479  | 0,00650188 | 0,0001471 | 5,67258E-08 | 0,82       | 150,87 |
| 0,215426  | 0,00628848 | 0,000141  | 1,43603E-09 | 0,68       | 188,88 |
| 0,316608  | 0,00553787 | 0,0001246 | 3,66622E-07 | 0,5        | 133,58 |
| 0,426593  | 0,00523984 | 0,0001175 | 2,07845E-07 | 0,93       | 139,29 |
| 0,011195  | 0,0454511  | 0,099125  | 4,69744E-06 | 0,234179   | 109,12 |
| 0,0252933 | 0,0167047  | 0,057094  | 4,31733E-07 | 0,402264   | 131,48 |
| 0,101402  | 0,00823623 | 0,034021  | 1,06507E-12 | 0,0638675  | 261,65 |
| 0,132172  | 0,00802224 | 0,026458  | 3,27047E-07 | 0,302526   | 134,55 |
| 0,407645  | 0,00534652 | 0,019444  | 2,47648E-06 | 0,673572   | 114,74 |
| 0,142032  | 0,00745231 | 0,025067  | 5,47314E-07 | 0,774118   | 128,65 |
| 0,105556  | 0,0082016  | 0,033885  | 4,10425E-06 | 0,639424   | 108,94 |
| 0,466239  | 0,00523696 | 0,020096  | 3,96588E-06 | 0,424656   | 109,98 |
| 0,328597  | 0,00549191 | 0,018783  | 2,28278E-07 | 0,44301    | 138,34 |
| 0,113306  | 0,00860563 | 0,028054  | 7,19695E-07 | 0,827985   | 126,75 |
| 0,475048  | 0,00514647 | 0,01815   | 1,45525E-06 | 0,460208   | 119,8  |
| 0,262756  | 0,00588847 | 0,022535  | 2,40776E-06 | 0,791797   | 114,74 |

|           |            |          |             |          |        |
|-----------|------------|----------|-------------|----------|--------|
| 0,439283  | 0,00519588 | 0,017915 | 1,99226E-06 | 0,989636 | 117,14 |
| 0,110456  | 0,0089572  | 0,027148 | 2,30041E-06 | 0,239368 | 115,86 |
| 0,062586  | 0,0118232  | 0,036009 | 2,13436E-06 | 0,462619 | 116,41 |
| 0,310868  | 0,00544061 | 0,019125 | 2,77262E-07 | 0,589454 | 136,25 |
| 0,273327  | 0,00591995 | 0,020688 | 3,95134E-07 | 0,794842 | 133,07 |
| 0,205024  | 0,00630708 | 0,022462 | 1,28103E-07 | 0,203133 | 143,67 |
| 0,371096  | 0,0053782  | 0,018417 | 1,80548E-06 | 0,932397 | 117,64 |
| 0,264945  | 0,00596416 | 0,020517 | 6,94393E-07 | 0,589992 | 127,29 |
| 0,151405  | 0,00720811 | 0,024628 | 1,11551E-06 | 0,983039 | 122,29 |
| 0,480726  | 0,00515976 | 0,019921 | 2,65418E-06 | 0,770031 | 113,48 |
| 0,289544  | 0,0056781  | 0,019706 | 4,56121E-06 | 0,92809  | 108,53 |
| 0,383622  | 0,00528782 | 0,018456 | 8,23208E-07 | 0,945181 | 125,29 |
| 0,165006  | 0,00744654 | 0,024649 | 1,00922E-06 | 0,505075 | 123,35 |
| 0,370758  | 0,00539032 | 0,018295 | 2,5449E-06  | 0,254225 | 114,01 |
| 0,230419  | 0,00629715 | 0,024233 | 3,32745E-08 | 0,72097  | 157,19 |
| 0,186575  | 0,00650188 | 0,022098 | 5,67258E-08 | 0,231947 | 150,87 |
| 0,237455  | 0,0060781  | 0,020726 | 3,16088E-06 | 0,489726 | 112,13 |
| 0,380153  | 0,00541762 | 0,018793 | 4,75044E-06 | 0,949239 | 107,98 |
| 0,472839  | 0,00518301 | 0,01804  | 4,12362E-06 | 0,680373 | 109,55 |
| 0,212448  | 0,00628848 | 0,021593 | 1,43603E-09 | 0,667327 | 188,88 |
| 0,183913  | 0,00672387 | 0,023277 | 3,86923E-06 | 0,262472 | 110,22 |
| 0,0515458 | 0,0129749  | 0,041199 | 4,22478E-06 | 0,443598 | 109,13 |
| 0,343199  | 0,00553787 | 0,018954 | 3,66622E-07 | 0,780497 | 133,58 |
| 0,426366  | 0,00523984 | 0,018793 | 2,07845E-07 | 0,822265 | 139,29 |
| 0,127789  | 0,00738691 | 0,026347 | 6,9643E-07  | 0,796199 | 127,04 |
| 0,210577  | 0,0067914  | 0,03769  | 1,10343E-07 | 0,611001 | 145,65 |
| 0,330063  | 0,00547216 | 0,030829 | 1,8284E-11  | 0,439821 | 233,71 |
| 0,520333  | 0,0051599  | 0,028994 | 2,33637E-06 | 0,46762  | 114,78 |
| 0,020777  | 0,0167047  | 0,107223 | 4,31733E-07 | 0,380548 | 131,48 |
| 0,288345  | 0,00579587 | 0,032774 | 2,62457E-08 | 0,254385 | 160,31 |
| 0,404839  | 0,00534652 | 0,030102 | 2,47648E-06 | 0,946625 | 114,74 |
| 0,13897   | 0,00745231 | 0,041726 | 5,47314E-07 | 0,799935 | 128,65 |

|          |            |          |             |          |        |
|----------|------------|----------|-------------|----------|--------|
| 0,455472 | 0,00523696 | 0,031516 | 3,96588E-06 | 0,69501  | 109,98 |
| 0,328105 | 0,00549191 | 0,031419 | 2,28278E-07 | 0,46097  | 138,34 |
| 0,264341 | 0,00588847 | 0,035287 | 2,40776E-06 | 0,95264  | 114,74 |
| 0,039156 | 0,0147306  | 0,084818 | 1,74561E-07 | 0,317443 | 141,29 |
| 0,06368  | 0,0118232  | 0,059623 | 2,13436E-06 | 0,547089 | 116,41 |
| 0,311702 | 0,00544061 | 0,031747 | 2,77262E-07 | 0,501534 | 136,25 |
| 0,204321 | 0,00630708 | 0,035649 | 1,28103E-07 | 0,27504  | 143,67 |
| 0,364439 | 0,00530438 | 0,030195 | 4,73059E-11 | 0,747632 | 223,84 |
| 0,373765 | 0,0053782  | 0,029991 | 1,80548E-06 | 0,495898 | 117,64 |
| 0,362648 | 0,0054735  | 0,031023 | 2,71919E-06 | 0,509354 | 113,69 |
| 0,144741 | 0,00720811 | 0,040494 | 1,11551E-06 | 0,597324 | 122,29 |
| 0,116499 | 0,00759621 | 0,045183 | 2,26511E-06 | 0,911439 | 115,05 |
| 0,480443 | 0,00515976 | 0,030639 | 2,65418E-06 | 0,767125 | 113,48 |
| 0,285731 | 0,0056781  | 0,031987 | 4,56121E-06 | 0,976711 | 108,53 |
| 0,37954  | 0,00528782 | 0,030109 | 8,23208E-07 | 0,860421 | 125,29 |
| 0,160864 | 0,00744654 | 0,040222 | 1,00922E-06 | 0,496581 | 123,35 |
| 0,229042 | 0,00629715 | 0,038635 | 3,32745E-08 | 0,615072 | 157,19 |
| 0,355488 | 0,00543121 | 0,030335 | 9,48143E-07 | 0,450894 | 124,09 |
| 0,202007 | 0,00674275 | 0,036638 | 4,73962E-06 | 0,987295 | 108,26 |
| 0,175047 | 0,00708759 | 0,038484 | 3,07171E-06 | 0,55341  | 112,79 |
| 0,186442 | 0,00650188 | 0,037168 | 5,67258E-08 | 0,846225 | 150,87 |
| 0,381659 | 0,00541762 | 0,030366 | 4,75044E-06 | 0,931152 | 107,98 |
| 0,214199 | 0,00628848 | 0,035835 | 1,43603E-09 | 0,748264 | 188,88 |
| 0,224295 | 0,00603038 | 0,034562 | 2,13305E-06 | 0,803486 | 115,75 |
| 0,186018 | 0,00672387 | 0,037325 | 3,86923E-06 | 0,891952 | 110,22 |
| 0,323625 | 0,00548864 | 0,03112  | 3,36101E-06 | 0,905735 | 111,32 |
| 0,051681 | 0,0129749  | 0,06411  | 4,22478E-06 | 0,863646 | 109,13 |
| 0,424831 | 0,00523984 | 0,03028  | 2,07845E-07 | 0,925198 | 139,29 |
| 0,125997 | 0,00738691 | 0,043844 | 6,9643E-07  | 0,740183 | 127,04 |
| 0,195643 | 0,0067914  | 0,024124 | 1,10343E-07 | 0,366087 | 145,65 |
| 0,00809  | 0,0454511  | 0,097143 | 4,69744E-06 | 0,904877 | 109,12 |
| 0,520031 | 0,0051599  | 0,018551 | 2,33637E-06 | 0,435611 | 114,78 |

|          |            |          |             |           |        |
|----------|------------|----------|-------------|-----------|--------|
| 0,024675 | 0,0167047  | 0,066651 | 4,31733E-07 | 0,661206  | 131,48 |
| 0,279549 | 0,00579587 | 0,02075  | 2,62457E-08 | 0,698163  | 160,31 |
| 0,134273 | 0,00802224 | 0,028015 | 3,27047E-07 | 0,30509   | 134,55 |
| 0,415277 | 0,00534652 | 0,019431 | 2,47648E-06 | 0,389339  | 114,74 |
| 0,14256  | 0,00745231 | 0,026817 | 5,47314E-07 | 0,801683  | 128,65 |
| 0,097634 | 0,0082016  | 0,033568 | 4,10425E-06 | 0,97126   | 108,94 |
| 0,442877 | 0,00523696 | 0,020159 | 3,96588E-06 | 0,794503  | 109,98 |
| 0,33351  | 0,00549191 | 0,020013 | 2,28278E-07 | 0,724461  | 138,34 |
| 0,468515 | 0,00514647 | 0,018688 | 1,45525E-06 | 0,183332  | 119,8  |
| 0,258606 | 0,00588847 | 0,022777 | 2,40776E-06 | 0,986401  | 114,74 |
| 0,442409 | 0,00519588 | 0,018715 | 1,99226E-06 | 0,331374  | 117,14 |
| 0,467321 | 0,0051675  | 0,018806 | 5,54023E-07 | 0,0928603 | 129,63 |
| 0,103835 | 0,0089572  | 0,031517 | 2,30041E-06 | 0,466475  | 115,86 |
| 0,032817 | 0,0147306  | 0,055904 | 1,74561E-07 | 0,80045   | 141,29 |
| 0,064621 | 0,0118232  | 0,038592 | 2,13436E-06 | 0,232326  | 116,41 |
| 0,318695 | 0,00544061 | 0,020218 | 2,77262E-07 | 0,29444   | 136,25 |
| 0,223458 | 0,00630708 | 0,022859 | 1,28103E-07 | 0,193311  | 143,67 |
| 0,371332 | 0,00530438 | 0,019368 | 4,73059E-11 | 0,0228544 | 223,84 |
| 0,36894  | 0,0053782  | 0,019162 | 1,80548E-06 | 0,997312  | 117,64 |
| 0,387353 | 0,0054735  | 0,019781 | 2,71919E-06 | 0,49954   | 113,69 |
| 0,166282 | 0,00720811 | 0,025856 | 1,11551E-06 | 0,851934  | 122,29 |
| 0,485329 | 0,00515976 | 0,019599 | 2,65418E-06 | 0,364369  | 113,48 |
| 0,271097 | 0,0056781  | 0,020576 | 4,56121E-06 | 0,533909  | 108,53 |
| 0,399655 | 0,00528782 | 0,019178 | 8,23208E-07 | 0,134126  | 125,29 |
| 0,14596  | 0,00744654 | 0,025919 | 1,00922E-06 | 0,856084  | 123,35 |
| 0,364959 | 0,00539032 | 0,019409 | 2,5449E-06  | 0,241167  | 114,01 |
| 0,230436 | 0,00629715 | 0,024801 | 3,32745E-08 | 0,564481  | 157,19 |
| 0,334399 | 0,00543121 | 0,019446 | 9,48143E-07 | 0,797566  | 124,09 |
| 0,157812 | 0,00708759 | 0,024962 | 3,07171E-06 | 0,206739  | 112,79 |
| 0,090808 | 0,00885138 | 0,033215 | 2,08938E-07 | 0,579486  | 139,08 |
| 0,191022 | 0,00650188 | 0,023664 | 5,67258E-08 | 0,429073  | 150,87 |
| 0,236383 | 0,0060781  | 0,021784 | 3,16088E-06 | 0,699977  | 112,13 |



|          |            |          |             |          |        |
|----------|------------|----------|-------------|----------|--------|
| 0,356783 | 0,00541762 | 0,019407 | 4,75044E-06 | 0,417897 | 107,98 |
| 0,469322 | 0,00518301 | 0,018724 | 4,12362E-06 | 0,581735 | 109,55 |
| 0,201146 | 0,00628848 | 0,022884 | 1,43603E-09 | 0,376588 | 188,88 |
| 0,23575  | 0,00603038 | 0,022058 | 2,13305E-06 | 0,862701 | 115,75 |
| 0,201838 | 0,00672387 | 0,023811 | 3,86923E-06 | 0,517315 | 110,22 |
| 0,057118 | 0,0129749  | 0,042091 | 4,22478E-06 | 0,45559  | 109,13 |
| 0,396325 | 0,00523984 | 0,019329 | 2,07845E-07 | 0,901974 | 139,29 |
| 0,120505 | 0,00738691 | 0,027708 | 6,9643E-07  | 0,364091 | 127,04 |

©2024 Wang X.J. et al.
